# Supplementary material for: Synthesis and characterization of new dual stimuli-responsive bisazobenzene derivatives
Source: Royal Society of Chemistry journal article supplement (doi:10.1039/c6ra07803f), 2016-01-01
Supplement: c6ra07803f1.pdf [file c6ra07803f1.pdf]

## Synthesis and characterization of new dual stimuli-responsive bisazobenzene derivatives

M. Homocianu, D. Serbezeanu, I.-D. Carja, A. M. Macsim, T. Vlad-Bubulac and A. Airinei

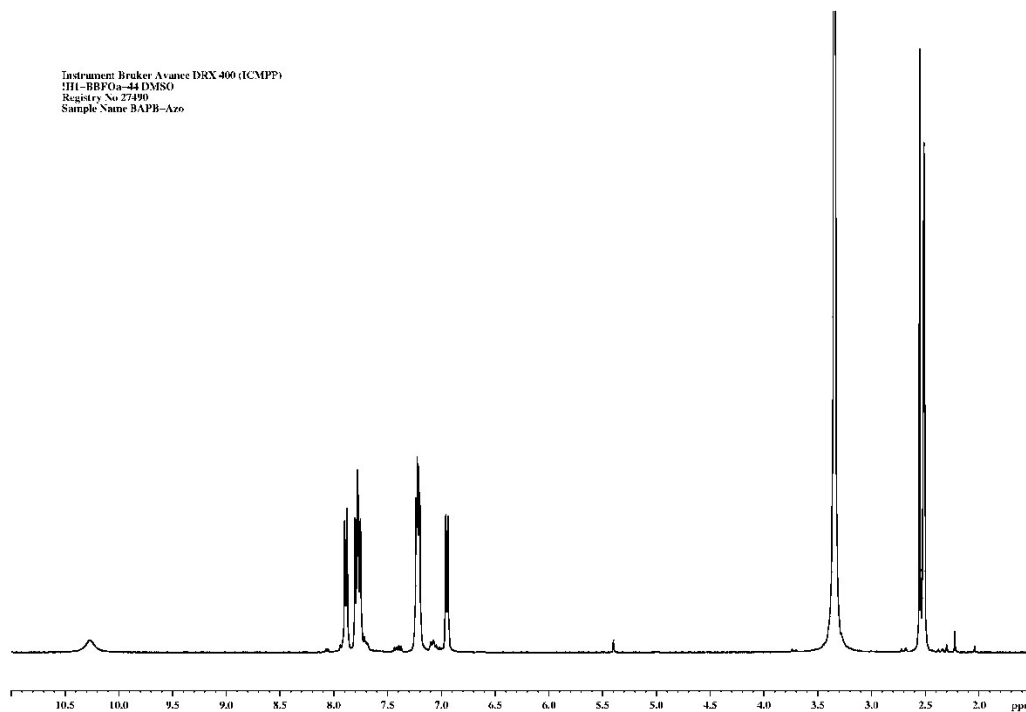

**Fig. S1** <sup>1</sup>H NMR spectrum of the **BAPB-Azo**

Parameter Set:#C13-CPD-QNP-34 (2008.11.19) TS1.3PL8.  
NMR System: Bruker Avance DRX 400 (ICMPP)  
Registry No.:28731  
Sample name :BAPB-Azo

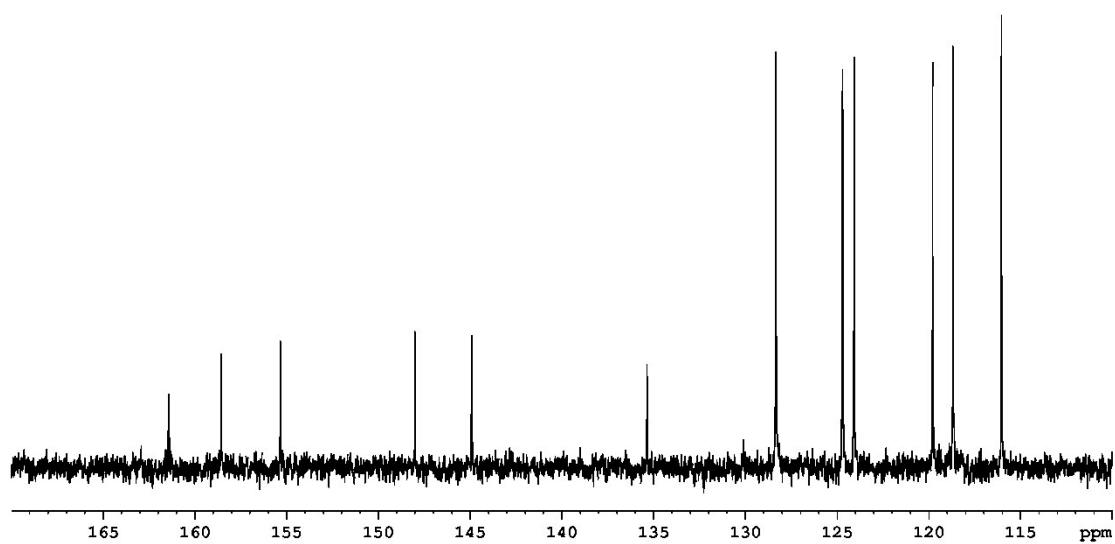

**Fig. S2** <sup>13</sup>C NMR spectrum of the **BAPB-Azo**

Parameter Set: #H1-QNP-34 (2008.11.19) TSI.3PL.8  
NMR System: Bruker Avance DRX 400 (1CMPP)  
Registry No 31994  
Sample Name : BAPB-Azo-C6H5

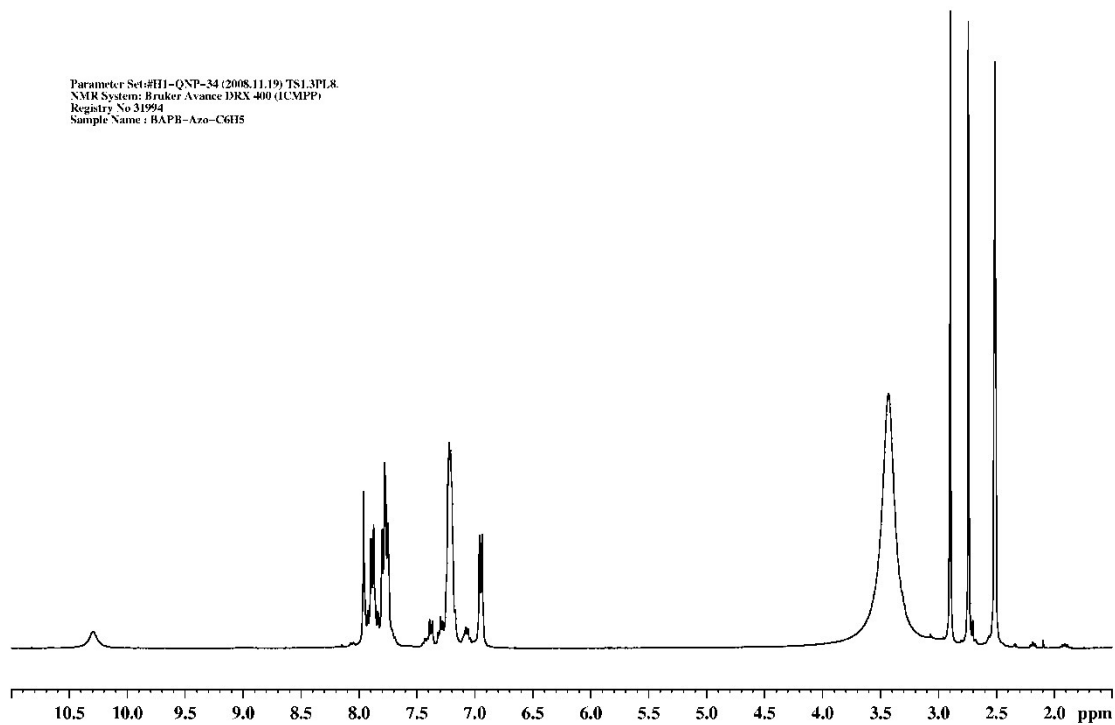

**Fig. S3** <sup>1</sup>H NMR spectrum of the **BAPB-Azo-C<sub>6</sub>H<sub>5</sub>**

Instrument Bruker Avance DRX 400 (ICMPP)  
Registry No 31994  
Sample Name : BAPB-Azo-C6H5  
#C13-CPD-QNP-34 DMSO

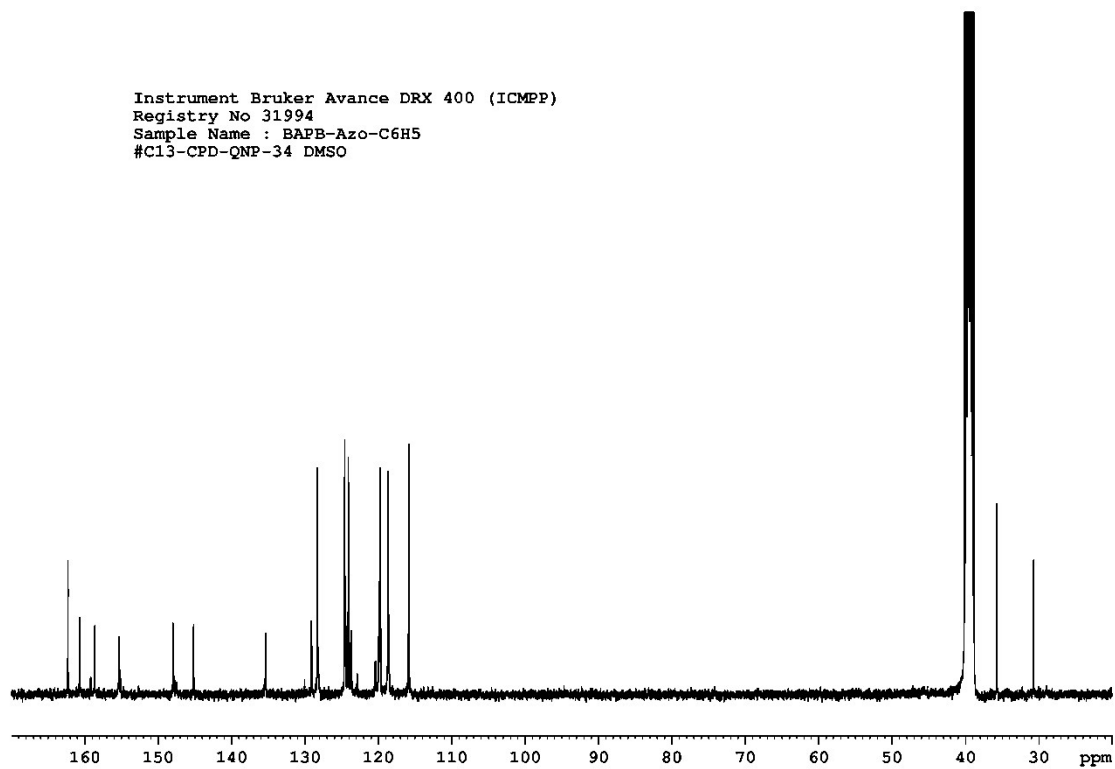

**Fig. S4**  $^{13}\text{C}$  NMR spectrum of the **BAPB-Azo-C<sub>6</sub>H<sub>5</sub>**

Parameter Set: %P31-BBIa-42. (AV III 14.11.04 TS 2.1PL6).  
Instrument: Bruker Avance III 400 (ICMPP).  
Registry No.: 10673  
Sample name: BAPB-Azo-C6H5

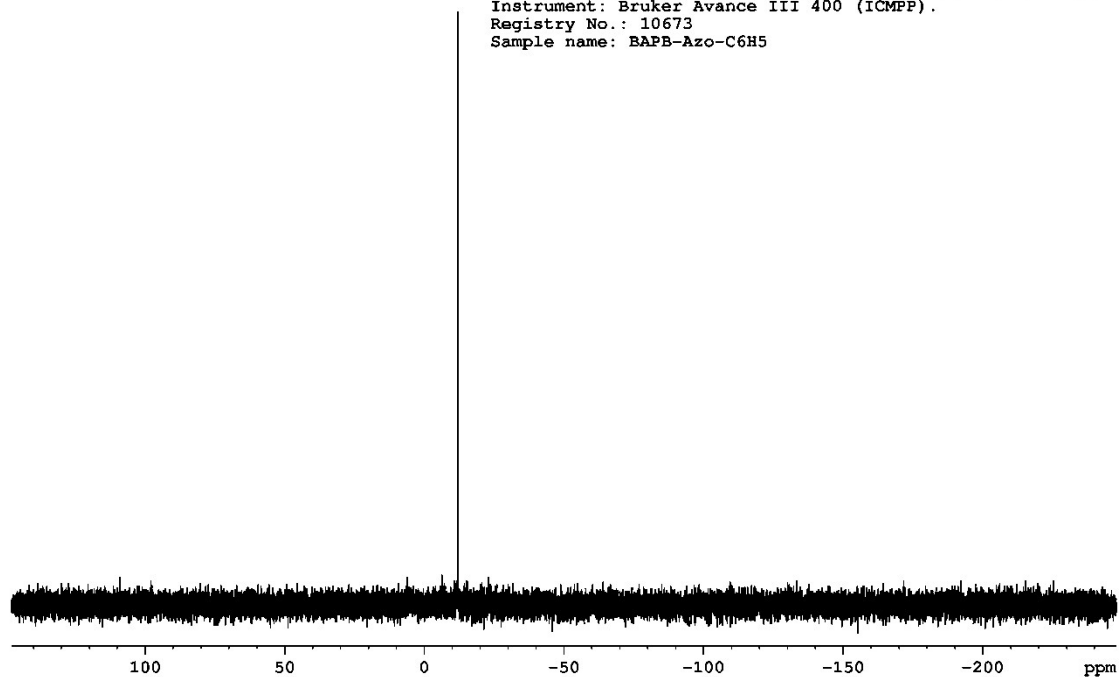

**Fig. S5**  $^{31}\text{P}$  NMR spectrum of the **BAPB-Azo-C<sub>6</sub>H<sub>5</sub>**

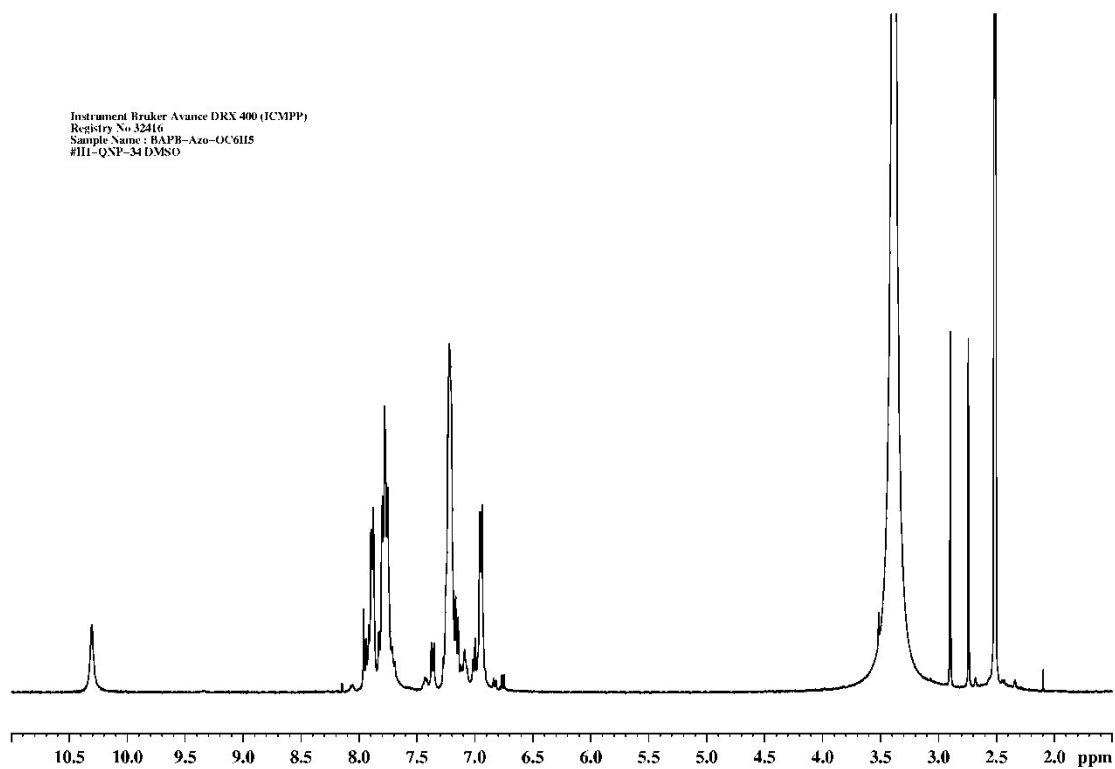

**Fig. S6** <sup>1</sup>H NMR spectrum of the **BAPB-Azo-OC<sub>6</sub>H<sub>5</sub>**

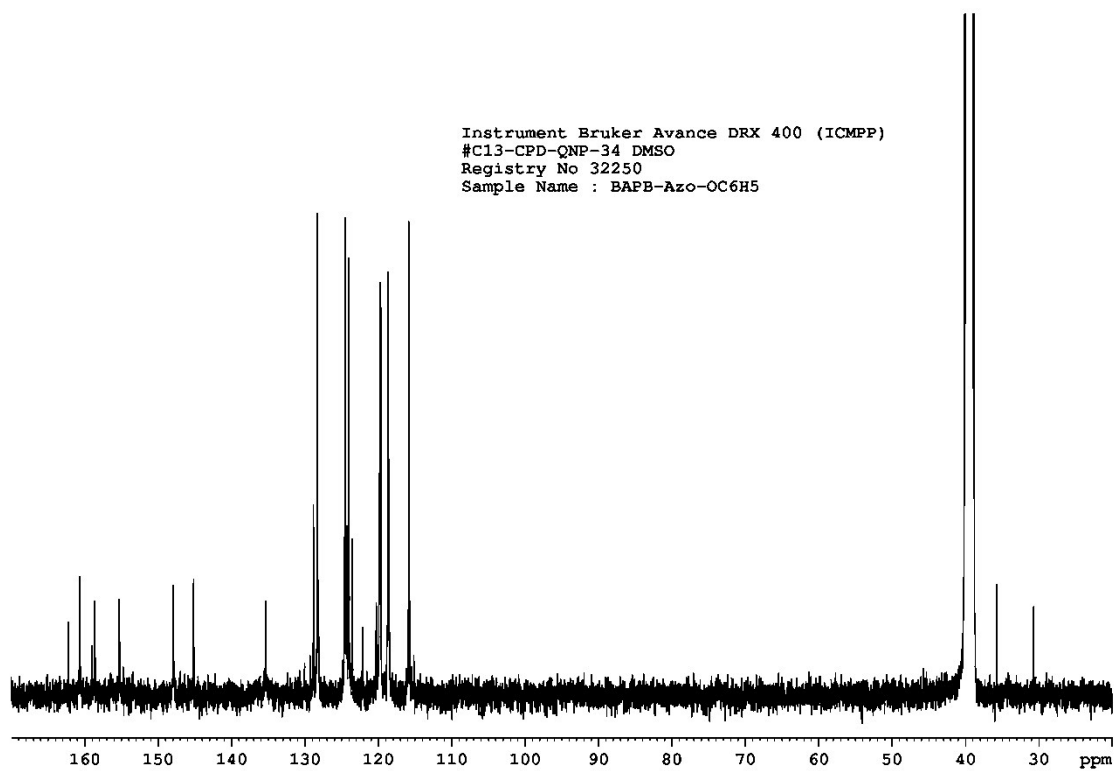

**Fig. S7**  $^{13}\text{C}$  NMR spectrum of the **BAPB-Azo-OC<sub>6</sub>H<sub>5</sub>**

Parameter Set: %P31-BB1a-42. (AV III 14.11.04 TS 2.1PL6).  
Instrument: Bruker Avance III 400 (ICMPP).  
Registry No.: 10757  
Sample name: BAPB-Azo-OC6H5

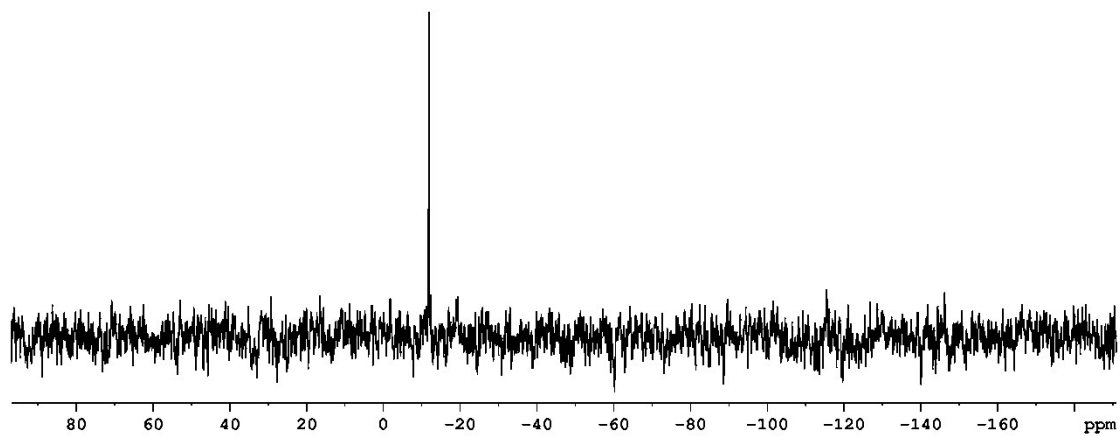

**Fig. S8**  $^{31}\text{P}$  NMR spectrum of the **BAPB-Azo-OC<sub>6</sub>H<sub>5</sub>**



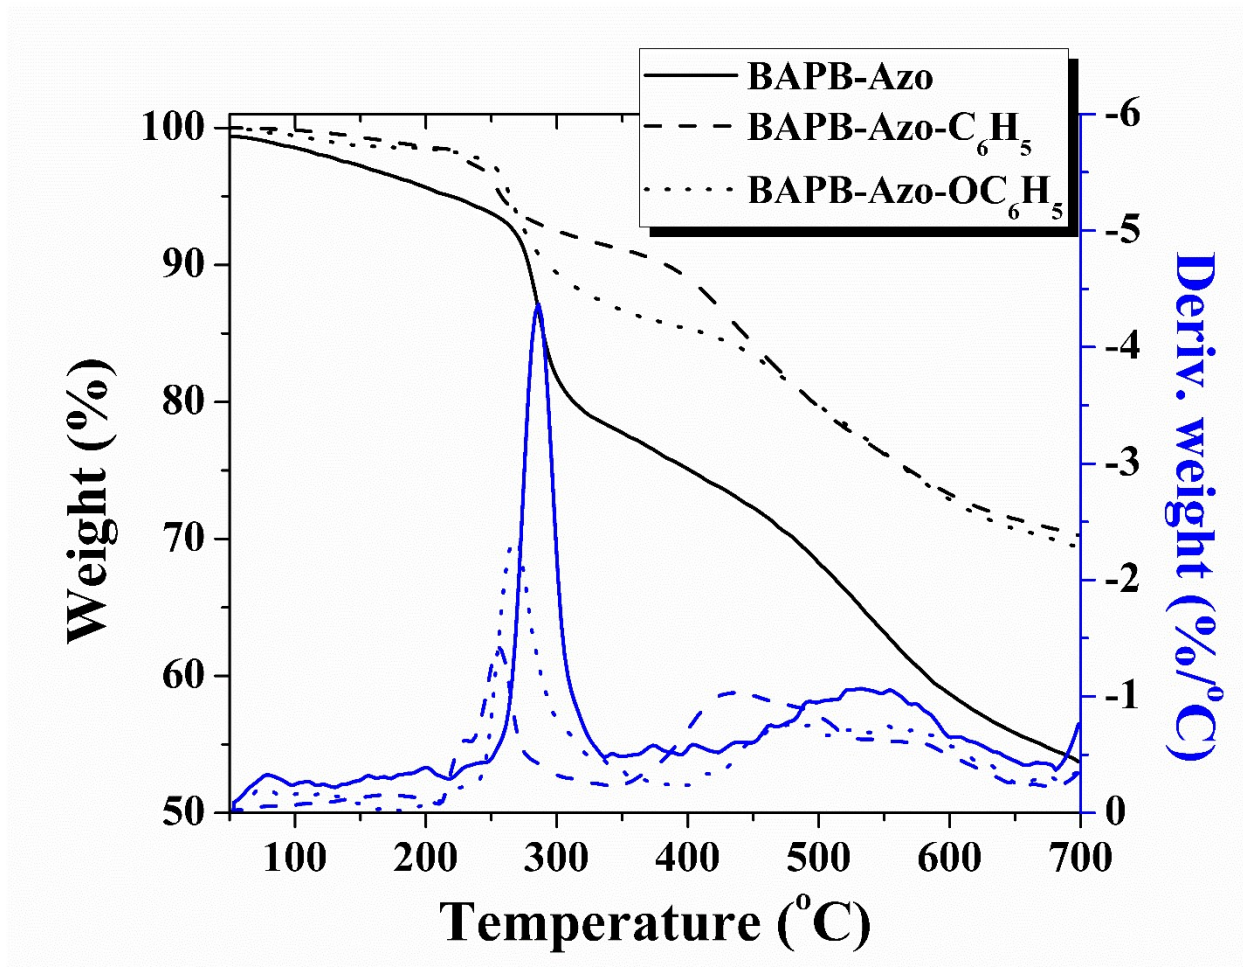

Fig. S9 TG curves for BAPB-Azo, BAPB-Azo-C<sub>6</sub>H<sub>5</sub> and BAPB-Azo-OC<sub>6</sub>H<sub>5</sub>
